# Supplementary material for: Proton-transporting heliorhodopsins from marine giant viruses
Source: eLife. 2022 Sep 6;11:e78416. doi: 10.7554/eLife.78416 (PMC9448325; doi:10.7554/eLife.78416)
Supplement: Supplementary file 2. — List of viral genomes and phylogenetic markers used in this study. For each virus, accessions of heliorhodopsins (HeRs) genes and accessions for the indicated phylogenetic markers are provided. [file elife-78416-supp2.xlsx]

## Sheet: Sheet1
Virus	Abbreviation	Genus	Coccolithovirus lineage	Genome accession	HeR genes				Phylogenetic markers:		1	2	3	4	5	6	7	8	9	10	11	12	14	15	16	17	18	19	20	21	22	23	24	25	26	27
										Alg.-Conn.	0.299	0.286	0.219	0.0394	0.0322	0.0276	0.571	0.375	0.0329	0.807	0.72	0.705	0.679	0.652	0.612	0.61	0.562	0.443	0.443	0.435	0.39	0.339	0.293	0.227	0.0297	0.027
					VHeR1	VHeR2	VHeR3	VHeR4		Annotation	Pox-VLTF3-like transcription factor (pfam_search: PF04947.15)	VV A32 ATPase (hhsearch: PF04665.14)	DNA polymerase B (pfam_search: PF00136.22, PF03104.20)	Zinc finger MYM-type protein (hhsearch: PF06467.16)	D5-like helicase (pfam_search: PF08706.12, hhsearch: PF04735.14)	ERV1/ALR family protein (pfam_search: PF04777.14)	Ribonucleoside-diphosphate reductase small subunit (pfam_search: PF00268.22)	Ribonucleoside-diphosphate reductase (pfam_search: PF02867.16)			RNA polymerase Rpb1 (pfam_search: PF00623.21)	Clp protease (pfam_search: PF00574.24)	Peptidase C92 family protein (hhsearch: PF05708.14)		RNA polymerase Rpb2 (pfam_search: PF00562.29)					DUF5767-family protein (pfam_search: PF19071.1)		DUF5654-family protein (hhsearch: PF18898.2)	DUF5088/DUF5521-family protein (hhsearch: PF17008.7, PF17659.3)	Major capsid protein (pfam_search: PF16903.6, PF04451.13)	Helicase (hhsearch: PF00580.23, PF01443.20)	Prim-pol-family protein (hhsearch: PF18188.3)
Emiliania huxleyi Virus EhV-145	EhV-145	Coccolithovirus	201	KF481686.1	AHA54620.1	AHA54649.1					AHA55019.1	AHA54641.1	AHA54589.1	AHA55061.1	AHA55089.1	AHA54708.1	AHA54584.1	AHA55049.1	AHA55071.1	AHA55087.1	AHA54632.1	AHA54716.1	AHA54741.1	AHA55030.1	AHA55057.1	AHA55046.1	AHA54798.1	AHA54693.1	AHA55047.1	AHA54733.1	AHA54987.1	AHA54995.1	AHA54719.1	AHA54657.1	AHA54685.1	AHA54713.1
Emiliania huxleyi Virus EhV-156	EhV-156	Coccolithovirus	202	KF481687.1	AHA55180.1	AHA55207.1	AHA55390.1				AHA55519.1	AHA55200.1	AHA55157.1	AHA55558.1	AHA55582.1	AHA55266.1	AHA55153.1	AHA55547.1	AHA55567.1	AHA55580.1	AHA55191.1	AHA55268.1	AHA55295.1	AHA55530.1	AHA55553.1	AHA55542.1	AHA55344.1	AHA55243.1	AHA55544.1	AHA55286.1	AHA55489.1	AHA55497.1	AHA55271.1	AHA55216.1	AHA55236.1	AHA55267.1
Emiliania huxleyi Virus EhV-164	EhV-164	Coccolithovirus	201	KF481688.1	AHA55657.1	AHA55683.1					AHA56027.1	AHA55676.1	AHA55630.1	AHA56066.1	AHA56092.1	AHA55734.1	AHA55625.1	AHA56055.1	AHA56075.1	AHA56090.1	AHA55668.1	AHA55741.1	AHA55765.1	AHA56039.1	AHA56063.1	AHA56052.1	AHA55819.1	AHA55722.1	AHA56053.1	AHA55757.1	AHA55999.1	AHA56006.1	AHA55744.1	AHA55692.1	AHA55716.1	AHA55739.1
Emiliania huxleyi Virus EhV-18	EhV-18	Coccolithovirus	202	KF481685.1	AHA54134.1	AHA54161.1	AHA54352.1				AHA54476.1	AHA54154.1	AHA54109.1	AHA54519.1	AHA54543.1	AHA54210.1	AHA54105.1	AHA54507.1	AHA54527.1	AHA54541.1	AHA54145.1	AHA54208.1	AHA54246.1	AHA54488.1	AHA54514.1	AHA54502.1	AHA54295.1	AHA54195.1	AHA54504.1	AHA54238.1	AHA54448.1	AHA54455.1	AHA54205.1	AHA54170.1	AHA54189.1	AHA54209.1
Emiliania huxleyi Virus EhV-201	EhV-201	Coccolithovirus	201	JF974311.1	AET97940.1	AET97964.1					AET98111.1	AET97958.1	AET97918.1	AET98148.1	AET98273.1	AET98011.1	AET97913.1	AET98138.1	AET98287.1	AET98274.1	AET97950.1	AET98016.1	AET98332.1	AET98122.1	AET98144.1	AET98135.1	AET98258.1	AET97998.1	AET98136.1	AET98325.1	AET98084.1	AET98091.1	AET98019.1	AET97971.1	AET97993.1	AET98015.1
Emiliania huxleyi Virus EhV-202	EhV-202	Coccolithovirus	202	HQ634145.1	AET42597.1	AET42570.1	AET42421.1				AET42721.1	AET42577.1	AET42621.1	AET42683.1	AET42660.1	AET42523.1	AET42625.1	AET42694.1	AET42675.1	AET42662.1	AET42586.1	AET42525.1	AET42491.1	AET42710.1	AET42688.1	AET42699.1	AET42375.1	AET42536.1	AET42697.1	AET42499.1	AET42748.1	AET42740.1	AET42528.1	AET42561.1	AET42542.1	AET42524.1
Emiliania huxleyi Virus EhV-203	EhV-203	Coccolithovirus	201	JF974291.1	AEO98271.1	AEO98297.1					AEO98378.1	AEO98290.1	AEO98248.1	AEO98343.1	AEO98312.1	AEO98094.1	AEO98243.1	AEO98353.1	AEO98328.1	AEO98314.1	AEO98282.1	AEO98089.1	AEO98055.1	AEO98367.1	AEO98347.1	AEO98355.1	AEO98079.1	AEO98107.1	AEO98354.1	AEO98048.1	AEO98406.1	AEO98398.1	AEO98086.1		AEO98112.1	AEO98090.1
Emiliania huxleyi Virus EhV-207	EhV-207	Coccolithovirus	201	JF974317.1	AEP15598.1	AEP15622.1					AEP15484.1	AEP15616.1	AEP15576.1	AEP15448.1	AEP15421.1	AEP15667.1	AEP15571.1	AEP15458.1	AEP15434.1	AEP15422.1	AEP15608.1	AEP15672.1	AEP15795.1	AEP15473.1	AEP15452.1	AEP15461.1	AEP15732.1	AEP15654.1	AEP15460.1	AEP15802.1	AEP15512.1	AEP15504.1	AEP15675.1	AEP15627.1	AEP15649.1	AEP15671.1
Emiliania huxleyi Virus EhV-208	EhV-208	Coccolithovirus	201	JF974318.1	AEP16016.1	AEP15993.1					AEP15907.1	AEP15999.1	AEP16038.1	AEP16083.1	AEP16056.1	AEP16100.1	AEP16043.1	AEP15882.1	AEP16069.1	AEP16057.1	AEP16007.1	AEP16095.1	AEP16202.1	AEP15897.1	AEP16087.1	AEP15885.1	AEP16263.1	AEP16113.1	AEP15884.1	AEP16195.1	AEP15934.1	AEP15927.1	AEP16092.1		AEP16118.1	AEP16096.1
Emiliania huxleyi Virus EhV-84	EhV-84	Coccolithovirus	201	JF974290.1	AEO97867.1	AEO97890.1					AEO97939.1	AEO97884.1	AEO97841.1	AEO97979.1	AEO98001.1	AEO97636.1	AEO97836.1	AEO97968.1	AEO97986.1	AEO97999.1	AEO97877.1	AEO97631.1	AEO97569.1	AEO97950.1	AEO97975.1	AEO97965.1	AEO97594.1	AEO97651.1	AEO97966.1	AEO97576.1	AEO97911.1	AEO97919.1	AEO97628.1	AEO97895.1	AEO97656.1	AEO97632.1
Emiliania huxleyi Virus EhV-86	EhV-86	Coccolithovirus	201	NC_007346.1	YP_293809.1	YP_293832.1					YP_294161.1	YP_293826.1	YP_293784.1	YP_294196.1	YP_294217.1	YP_293881.1	YP_293780.1	YP_294186.1	YP_294204.1	YP_294216.1	YP_293818.1	YP_293886.1	YP_293907.1	YP_294171.1	YP_294192.1	YP_294183.1	YP_293954.1	YP_293866.1	YP_294184.1	YP_293900.1	YP_294133.1	YP_294141.1	YP_293889.1	YP_293839.2	YP_293861.1	YP_293885.1
Emiliania huxleyi Virus EhV-88	EhV-88	Coccolithovirus	201	JF974310.1	AEP14993.1	AEP15017.1					AEP15143.1	AEP15011.1	AEP14967.1	AEP15107.1	AEP15084.1	AEP15066.1	AEP14962.1	AEP15116.1	AEP15098.1	AEP15085.1	AEP15003.1	AEP15071.1	AEP15387.1	AEP15132.1	AEP15111.1	AEP15119.1	AEP15223.1	AEP15051.1	AEP15118.1	AEP15394.1	AEP15171.1	AEP15163.1	AEP15074.1	AEP15024.1	AEP15046.1	AEP15070.1
Emiliania huxleyi Virus EhV-99B1	EhV-99B1	Coccolithovirus	201	FN429076.1	CAZ69391.1	CAZ69414.1					CAZ69734.1	CAZ69408.1	CAZ69369.1	CAZ69768.1	CAZ69789.1	CAZ69457.1	CAZ69365.1	CAZ69758.1	CAZ69776.1	CAZ69788.1	CAZ69400.1	CAZ69462.1	CAZ69483.1	CAZ69744.1	CAZ69764.1	CAZ69755.1	CAZ69528.1	CAZ69444.1	CAZ69756.1	CAZ69476.1	CAZ69704.1	CAZ69713.1	CAZ69465.1	CAZ69419.1	CAZ69439.1	CAZ69461.1
Emiliania huxleyi Virus EhV-PS401	EhV-PS401	Coccolithovirus	PS401	HQ634146.1				AET73409.1			AET73426.1	AET73517.1	AET73418.1	AET73556.1	AET73423.1	AET73510.1				AET73557.1	AET73545.1	AET73563.1	AET73489.1	AET73432.1	AET73578.1	AET73487.1	AET73592.1	AET73381.1	AET73431.1	AET73562.1	AET73542.1	AET73377.1	AET73373.1	AET73399.1	AET73610.1	AET73499.1
Ectocarpus siliculosus Virus-1	EsV-1	Phaeovirus	outgroup	AF204951.2							AAK14519.1	AAK14452.1	AAK14511.1	AAK14514.1	AAK14527.1	AAK14575.1	AAK14546.1	AAK14594.1	AAK14518.1															AAK14534.1
Feldmannia species virus 158	FsV-158	Phaeovirus	outgroup	EU916176.1							ACH46780.1	ACH46839.1	ACH46845.1	ACH46774.1	ACH46786.1	ACH46809.1	ACH46846.1	ACH46848.1	ACH46779.1															ACH46811.1
