# Supplementary material for: Proton-transporting heliorhodopsins from marine giant viruses
Source: eLife. 2022 Sep 6;11:e78416. doi: 10.7554/eLife.78416 (PMC9448325; doi:10.7554/eLife.78416)
Supplement: Supplementary file 3. — Supplementary information for methods. [file elife-78416-supp3.xlsx]

## Sheet: Sequence extraction_1
Pairwise protein sequence identities (%) between the tested HeRs in the transmembrane regions (total alignment length of 150 residues).
	VPS401 HeR	V2HeR3	VTara5482HeR	VTara4616HeR	VTara8957HeR	V2HeR2	V1HeR2	V2HeR1	V1HeR1	EhHeR
VPS401HeR		36.7	35.3	37.3	40.7	38.7	38	22	22	31.3
V2HeR3	36.7		92.7	64.7	62.7	35.3	35.3	27.3	27.3	28.7
VTara5482HeR	35.3	92.7		64.7	61.3	34	34	27.3	26.7	28.7
VTara4616HeR	37.3	64.7	64.7		58.7	34.7	34	23.3	23.3	33.3
VTara8957HeR	40.7	62.7	61.3	58.7		34	35.3	22.7	22.7	28.7
V2HeR2	38.7	35.3	34	34.7	34		90	32.7	32.7	42
V1HeR2	38	35.3	34	34	35.3	90		32.7	32.7	39.3
V2HeR1	22	27.3	27.3	23.3	22.7	32.7	32.7		96	26
V1HeR1	22	27.3	26.7	23.3	22.7	32.7	32.7	96		24.7
EhHeR	31.3	28.7	28.7	33.3	28.7	42	39.3	26	24.7

## Sheet: Sequence extraction_2
	Genes encoded on the metagenomic sequences encoding HeR genes related to V2HeR3 (AET42421.1). Best-matching blastp hits against the nr database are provided.
	CDS	Function	Accession	Locus tag	Organism	Score	Query coverage	E-value	Identity
	Contig SAMEA2621075_258957
	tran_2	Heliorhodopsin	AET42421.1	EXVG_00394	EhV-202	284	0.96	4e-93	0.579
	Contig SAMEA2621401_1124616
	tran_2	Heliorhodopsin	AET42421.1	EXVG_00394	EhV-202	287	0.95	3e-94	0.575
	tran_3	Thioredoxin	AEO98306.1	ELVG_00005	EhV-203	151	0.76	4e-42	0.437
	Contig TARA_B100000767_G_C19749265_1
	tran_3	Heliorhodopsin	AET42421.1	EXVG_00394	EhV-202	464	1	3e-164	0.915
	tran_4	Unknown	AET42406.1	EXVG_00446	EhV-202	219	1	1e-71	0.896
	tran_5	Unknown	AET42405.1	EXVG_00445	EhV-202	108	0.81	1e-28	0.75

## Sheet: Sequence extraction_3
	Incidence of the EhHeR gene among Emiliania huxleyi transcriptomes.
	Matches were obtained by using blastp against the NCBI TSA database.
	Note that the gene is absent from the genome assembly of Emiliania huxleyi CCMP1516 (NCBI Assembly GCA_000372725.1).
	Strain	NCBI TSA contigs
	CCMP3266	GIZZ01039194.1, GIZZ01031796.1, GIZZ01022151.1, GIZZ01020795.1
	CCMP370	HBOC01014818.1, HBOC01014817.1, HBOC01014816.1, HBOC01014815.1, HBOC01014814.1, HBOC01014813.1
	CCMP371	GHJP01012634.1
	PLY M219	HBOB01045754.1, HBOB01045753.1, HBOB01045752.1, HBOB01045751.1, HBOB01045750.1, HBOB01045749.1, HBOB01045748.1, HBOB01045747.1, HBOB01045746.1, HBOB01045745.1, HBOB01045744.1, HBOB01045743.1
	RCC1229	HBTT01000153.1, HBTT01000152.1
	RCC1824	HBTF01056801.1, HBTF01054040.1, HBTF01054039.1
	RCC912	HBTW01055061.1, HBTW01038897.1, HBTW01038896.1

## Sheet: Primers
	List of primers used for insertions
	Plasmid	Sense primers	Anti-sense primers
	peGFP-P2A-cMyc-V2HeR3	ctcagaagaggatctgatggatacgattgttctgac	atgagtttttgttccatgctagcgggtccggggttc
	peGFP-P2A-V2HeR3-cMyc	tcagaagaggatctgtaaagcggccgcgactctag	gatgagtttttgttcacagatgcccgtcacaccg
	List of primers used for site-directed mutagenesis
	Mutations	Sense primers	Anti-sense primers
	D31N	aacgtgagccagacctttaaaatg	gcccagcagagcacaaacaatagc
	D88N	aacacctatcatcgttttctgagc	attccacagaaacgcgttgcccatg
	E105Q	cagtatagcatcaccgccccg	ggtccaacgaatcggatttttg
	D147N	aacgaaatccgtaaatatagc	cagaacaaagcccacgctaatg
	E148Q	gatcagatccgtaaatatagc	cagaacaaagcccacgctaatg
	E165Q	cagtttagcctgattatcctgagc	aaccagaaacggaatcatacccag
	E191Q	cagtttggtctgtggattctgtttc	cacaaagatggtaatcggcagatag
	E191D	gattttggtctgtggattctgtttc	cacaaagatggtaatcggcagatag
	E205Q	cagctgagcggcatcaactac	cagcaggctaacaaacggaaacag
	E215Q	cagctggtgttcatcgttctgagc	accgattttgtagttgatgccgc
	E236Q	cagaatgtcctgaaaaacggtgtg	agagttcaggataatcgccagcac
	List of primers used for subcloning into an eGFP-P2A vector
	In-Fusion cloning	Sense primers	Anti-sense primers
	P2A vector amplified primer	taaagcggccgcgactctagatc	catgctagcgggtccggggttctc
	Insert	Linear synthesized DNA (GENEWIZ)
	CaMKIIa vector amplified primer	taatgagcggccgcaatcaac	ggtggcgaattcgaagcttgag
	V2HeR3	cttcgaattcgccaccatggtgagcaagggcg	gattgcggccgctcattaacagatgcccgtcac

## Sheet: Buffers
Composition of pipette and bath solutions in whole-cell voltage or current clamp.
Abbreviations: Asp, aspartate; NMG, N-Methyl-D-glucamine; HEPES, 4-(2-hydroxyethyl)-1-piperazineethanesulfonic acid; EGTA, ethylene glycol tetraacetic acid; DNQX, 6,7-Dinitroquinoxaline-2,3-dione; D-AP5, D-(-)-2-amino-5-phosphonopentanoic acid.
All concentrations are in mM.
Recording for ND7/23 cells		pH (adjusted by)	NaCl	KCl	NaBr	NaNO3	Na2SO4	NaASP	NaOH	NMG	HCl	MgCl2	CaCl2	HEPES	MES	EGTA	KOH	Glucose
Bath	140 mM NMG-Cl, pHe 7.4	7.4 (HCl)	0	0	0	0	0	0	0	140	-	2	2	10	0	0	0	11
	140 mM NMG-Cl, pHe 6.0	6.0 (HCl)	0	0	0	0	0	0	0	140	-	2	2	0	10	0	0	11
	140 mM NaCl, pHe 7.4	7.4 (NMG)	140	0	0	0	0	0	0	-	0	2	2	10	0	0	0	11
	140 mM KCl, pHe 7.4	7.4 (NMG)	0	140	0	0	0	0	0	-	0	2	2	10	0	0	0	11
	140 mM NaASP, pHe 7.4	7.4 (NMG)	0	0	0	0	0	140	0	-	0	2	2	10	0	0	0	11
	140 mM NaBr, pHe 7.4	7.4 (NMG)	0	0	140	0	0	0	0	-	0	2	2	10	0	0	0	11
	140 mM NaNO3, pHe 7.4	7.4 (NMG)	0	0	0	140	0	0	0	-	0	2	2	10	0	0	0	11
	70 mM Na2SO4, pHe 7.4	7.4 (NMG)	0	0	0	0	70	0	0	-	0	2	2	10	0	0	0	11
Pipette	110 mM NMG-Cl, pHi 7.4	7.4 (NMG)	0	0	0	0	0	0	0	110	110	2	1	10	0	10	0	3
	110 mM NMG-Cl, pHi 6.0	6.0 (HCl)	0	0	0	0	0	0	0	110	-	2	1	0	10	10	0	3
	110 mM NaCl, pHi 7.4	7.4 (HCl)	0	0	0	0	0	0	110	0	-	2	1	10	0	10	0	3
	110 mM NaASP, pHi 7.4	7.4 (NMG)	0	0	0	0	0	110	0	-	0	2	1	10	0	10	1	3
	55 mM Na2SO4, pHi 7.4	7.4 (NMG)	0	0	0	0	55	0	0	-	0	2	1	10	0	10	0	3
Recording for Neuron		pH	NaCl	K-gluconate	KCl	MgCl2	CaCl2	HEPES	EGTA	Glucose
Bath	Tyrode's	7.4	138	0	3	1	2	10	0	11	4 NaOH
											0.02 DNQX
											0.025 D-AP5
											0.1 Picrotoxin
Pipette	K-gluconate	7.4	10	125	0	1	0	10	0.2	0	3 MgATP
											0.3 Na2GTP
											10 Na2-phosphocreatine
											0.1 Leupeptin
